# Supplementary material for: A one-step method for reduction and self-assembling of graphene oxide into reduced graphene oxide aerogels
Source: Royal Society of Chemistry journal article supplement (doi:10.1039/c2ta00820c), 2012-12-21
Supplement: c2ta00820c.pdf [file c2ta00820c.pdf]

## Supplementary Information

### A one-step method for reduction and self-assembling of graphene oxide into reduced graphene oxide aerogels

Mingxi Chen<sup>1</sup> Congcong Zhang<sup>1</sup> Xichuan Li<sup>1</sup> Lei Zhang<sup>1</sup> Yalu Ma<sup>1\*</sup> Li Zhang<sup>1</sup>

Xiaoyang Xu<sup>1</sup> Fengling Xia<sup>1</sup> Wei Wang<sup>2</sup> Jianoing Gao<sup>11</sup>

(<sup>1</sup>School of Science, <sup>2</sup>School of Chemical Engineering, Tianjin University, Tianjin

300072, P R China)

Table S1. The C/O ratio of rGO prepared by using different reductants

| Sample | C/O ratio | Reduction time | Reducing agent      | Reference |
|--------|-----------|----------------|---------------------|-----------|
| RGO    | 8.1       | 0.5h           | mercaptoacetic acid |           |
| RGO    | 4.78      | 2h             | NaBH <sub>4</sub>   | 1         |
| RGO    | 12.0      | 12h            | HI                  | 2         |
| RGO    | 10.3      | 24h            | Hydrazine           | 3         |
| RGO    | 7.7       | 12h            | Pyrrole             | 4         |
| RGO    | 7.4       | 24h            | p-phenylene diamine | 5         |
| RGO    | 6.9       | 9h             | chitosan            | 6         |
| RGO    | 11.9      | 72h            | Wild carrot         | 7         |

#### Preparation of rGO<sup>2</sup> by freeze-drying and thermal reduction

GO suspension was injected into a plastic tube (20mm in diameter and 50mm in length). The plastic tube was placed in an insulated styrofoam container, with only the bottom surface of the plastic tube exposed. The styrofoam container was placed onto the top of a 6 cm diameter metal disk, which in turn rested on a 6 cm-deep pool of

<sup>1</sup> Corresponding author. Tel.: +862227403475; Fax: (+86)22-2740-3475.  
E-mail address: jianpinggaols@163.com (J.P. Gao), mayalu@eyou.com (Y.L.Ma).

liquid nitrogen to create a uniaxial thermal gradient. As the liquid nitrogen evaporated, the mixture was unidirectionally frozen from bottom to the top. The solid was then transferred to a freeze-drying vessel (Alpha1–2, Christ, Germany) and freeze-dried for 48 h under vacuum (less than 20 Pa) to obtain porous GO monoliths. Then, GO monoliths was heated in an oven at 200 °C for 24 h to obtain rGO<sup>2</sup>.<sup>8</sup>

### Absorption of rGO aerogels and rGO<sup>2</sup> to Cu<sup>2+</sup> ions

The freeze-dried rGO aerogel and rGO<sup>2</sup> were put into a hermetic vessel containing 20 mL of an aqueous solution with 320 ppm of Cu<sup>2+</sup> ion. Then the vessel was put on a WH-4 multi-function shaker and shaken gently. The solution was taken out at 0.5 h, 1 h, 2 h, 4 h, 8 h, and 12 h to measure the absorbance of UV-Vis absorption spectra by using TU-1901 UV-Vis spectrophotometer. And the concentration of Cu<sup>2+</sup> ion was calculated by standard curve method.

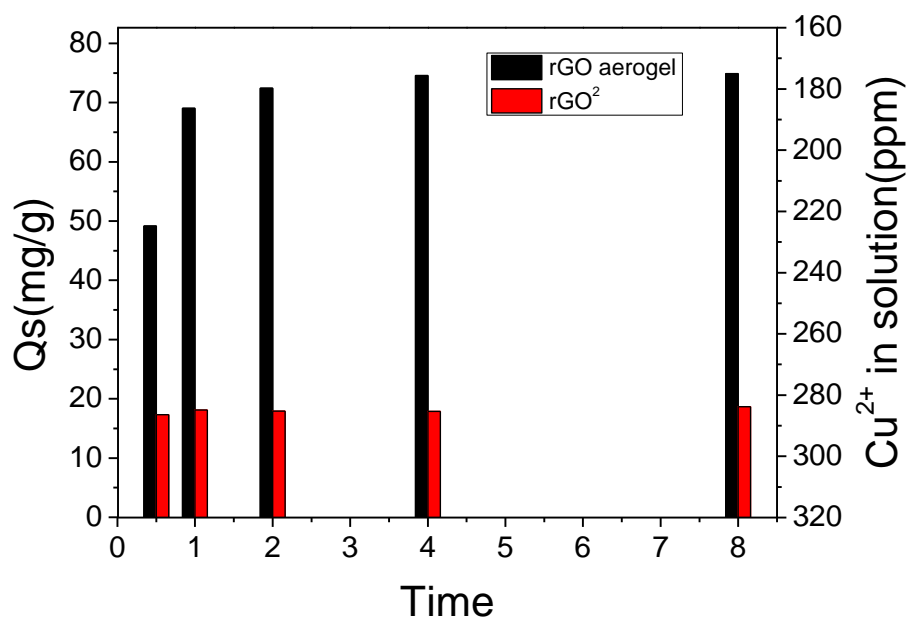

Figure S1. The absorption of Cu<sup>2+</sup> by rGO aerogels and rGO<sup>2</sup>

### References

1. H. J. Shin, K. K. Kim, A. Benayad, S. M. Yoon, H. K. Park, I. S. Jung, M. H. Jin, H. K. Jeong, J. M. Kim, J.Y. Choi and Y. H. Lee, *Adv. Funct. Mater.*, 2009, **19**, 1987-1992.

2. S. Pei, J. Zhao, J. Du, W. Ren and H. M. Cheng, *Carbon*, 2010, **48**, 4466-4474.
3. S. Stankovich, D. A. Dikina, R. D. Piner, K. A. Kohlhaas, A. Kleinhammes, Y. Jia, Y. Wu, S. T. Nguyen and R. S. Ruoff, *Carbon*, 2007, **45**, 1558-1565.
4. C. A. Amarnath, C. E. Hong, N. H. Kim, B. C. Ku, T. Kuila and J. H. Lee, *Carbon*, 2011, **49**, 3497-3502.
5. Y. Chen, X. Zhang, P. Yu and Y. Ma, *Chem. Commun.*, 2009, **30**, 4527-4529.
6. Y. Guo, X. Sun, Y. Liu, W. Wang, H. Qiu and J. Gao, *Carbon*, 2012, **50**, 2513-2523.
7. T. Kuila, S. Bose, P. Khanra, A. K. Mishra, N. H. Kim and J. H. Lee, *Carbon*, 2012, **50**, 914-921.
8. X. Wu, J. Zhou, W. Xing, G. Wang, H. Cui, S. Zhuo, Q. Xue, Z. Yana and S. Qiao *J. Mater. Chem.*, 2012, **22**, 23186
